# Supplementary material
Source: HighWire-hosted journal article supplement (https://www.rcpjournals.org/highwire/filestream/11640/field_highwire_adjunct_files/1/Roycroft_Supplementary_material_S2.pdf)
Supplement: Roycroft_Supplementary_material_S2.pdf [file Roycroft_Supplementary_material_S2.pdf]

S2 – Exception reports per trainee per quarter from guardian reports covering April 2018 quarter

| <b>Trust</b> | <b>Number of Trainees</b> | <b>Number of exception reports</b> | <b>Reports per trainee per quarter</b> |
|--------------|---------------------------|------------------------------------|----------------------------------------|
| <b>A</b>     | 178                       | 45                                 | <b>0.25</b>                            |
| <b>B</b>     | 340 <sup>+</sup>          | 104                                | <b>0.31</b>                            |
| <b>C</b>     | 404                       | 60                                 | <b>0.15</b>                            |
| <b>D</b>     | 115                       | 9                                  | <b>0.08</b>                            |
| <b>F</b>     | 173                       | 68                                 | <b>0.39</b>                            |
| <b>G</b>     | 1041                      | 93                                 | <b>0.09</b>                            |
| <b>H</b>     | 508                       | 76                                 | <b>0.15</b>                            |
| <b>I</b>     | 193                       | 15                                 | <b>0.08</b>                            |
| <b>J</b>     | 195 <sup>+</sup>          | 15                                 | <b>0.08</b>                            |
| <b>K</b>     | 100                       | 15                                 | <b>0.15</b>                            |
| <b>L</b>     | 172 <sup>+</sup>          | 27                                 | <b>0.16</b>                            |
| <b>N</b>     | 833 <sup>+</sup>          | 132                                | <b>0.16</b>                            |
| <b>O</b>     | 101                       | 3                                  | <b>0.03</b>                            |
| <b>P</b>     | 479 <sup>+</sup>          | 29                                 | <b>0.06</b>                            |
| <b>Q</b>     | 375 <sup>+</sup>          | 102                                | <b>0.27</b>                            |
| <b>R</b>     | 75                        | 49                                 | <b>0.65</b>                            |
| <b>S</b>     | 710                       | 45                                 | <b>0.06</b>                            |
| <b>T</b>     | 288 <sup>+</sup>          | 71                                 | <b>0.25</b>                            |
| <b>U</b>     | 131                       | 30                                 | <b>0.23</b>                            |
| <b>V</b>     | 92                        | 12                                 | <b>0.13</b>                            |
| <b>W</b>     | 461                       | 48                                 | <b>0.10</b>                            |
| <b>X</b>     | 384                       | 33                                 | <b>0.09</b>                            |
| <b>Y</b>     | 750                       | 230                                | <b>0.31</b>                            |
| <b>Z</b>     | 121                       | 30                                 | <b>0.25</b>                            |

<sup>+</sup> are a calculated number of trainees derived from multiplying NTS responses by 1.16. All others are reported number of trainees on the 2016 TCS from the quarterly guardian report.
